# Supplementary material for: Effects of four different times of day on various aspects of maximal short-term physical performance in young soccer players
Source: PeerJ. 2025 Oct 22;13:e20065. doi: 10.7717/peerj.20065 (PMC12553368; doi:10.7717/peerj.20065)
Supplement: Supplemental Information 2 — Athletes: Participant ID. Age: Age of the participants in years. Height: Height of the participants in meters. Weight: Body weight of the participants in kilograms. BMI: Body Mass Index calculated as weight (kg) / [height (m)]2. Experience (year): Years of experience in the respective sport.Training Timing: Usual time of day for training sessions (HH:MM:SS format). Sessions/Week: Number of training sessions per week. Session Duration: Average duration of each training session (HH:MM:SS format). MEQ Score (au): Morningness-Eveningness Questionnaire score in arbitrary units. PSQI Score (au): Pittsburgh Sleep Quality Index score in arbitrary units. Sleep Duration (h): Average sleep duration in hours. Caffeine (mg): Daily caffeine consumption in milligrams. Abbreviations: BMI: Body Mass Index MEQ: Morningness-Eveningness QuestionnairePSQI: Pittsburgh Sleep Quality Index [file peerj-13-20065-s002.xlsx]

## Sheet: Feuil1
Jeune athlète	Age	Height	weight	IMC	Expérience (an)	Heure d'entraînement	nombre des séances/semaine	Durée de la séance	MEQ score (au)	PSQI score (au)	Sleep duration(h)	CAFFEINE
1	15	40.7	1.58	16.3035	5	17:00:00	3	01:15:00	51	4	7	60.12
2	15	64	1.8	19.7531	4	17:00:00	3	01:15:00	56	2	9	50.73
3	15	45.8	1.64	17.0286	2	17:00:00	3	01:15:00	48	2	9	45.65
4	15	74	1.83	22.0968	2	17:00:00	3	01:15:00	51	3	8	55.93
5	13	43.5	1.6	16.9922	4	17:00:00	3	01:15:00	50	1	10	28.14
6	15	46.8	1.6	18.2812	2	17:00:00	3	01:15:00	45	2	9	45.32
7	15	52.2	1.7	18.0623	4	17:00:00	3	01:15:00	51	1	8	40.77
8	14	65.5	1.8	20.216	2	17:00:00	3	01:15:00	49	3	7	40.23
9	15	64.8	1.82	19.5629	2	17:00:00	2	01:15:00	44	1	7	53.01
10	15	76.5	1.78	24.1447	2	17:00:00	2	01:15:00	55	3	10	27.18
11	15	80.2	1.77	25.5993	2	17:00:00	2	01:15:00	51	4	9	52.12
12	15	76.7	1.83	22.903	6	17:00:00	3	01:15:00	53	6	7	20.55
13	15	50.4	1.72	17.0362	3	17:00:00	3	01:15:00	55	4	7	50.64
14	13	42.3	1.62	16.118	2	17:00:00	4	01:15:00	49	5	8	33.1
15	13	45.4	1.62	17.2992	2	17:00:00	5	01:15:00	45	5	8	30.77
16	14	55.4	1.74	18.2983	6	17:00:00	3	01:15:00	52	3	8	25.18
17	15	54.2	1.72	18.3207	2	17:00:00	4	01:15:00	43	2	8	20.1
18	15	48.2	1.64	17.9209	2	17:00:00	4	01:15:00	55	2	8	50.15
19	15	56.4	1.74	18.6286	3	17:00:00	3	01:15:00	56	2	9	50.2
Moyenne	14.5789	57	1.71316	19.1877	3		3.10526		50.4737	2.89474	8.21053	41.0468
	Oral temperature						Medcine ball throw test		(m)				Sprint 5m (sec)	5m
Athletes	08:00h	11:00h	15:00h	18:00h		Athletes	08:00h	11:00h	15:00h	18:00h		Athletes	08:00h	11:00h	15:00h	18:00h
1	34.9	34.6	34.7	36.2		1	3.6	4.5	4.3	4.55		1	1.97	1.73	1.75	1.24
2	34.8	34.9	35.9	36		2	4.95	5.8	5.6	6.1		2	1.87	1.77	1.7	1.74
3	34.6	34.5	35.7	36		3	3.1	4.1	4.4	4.5		3	2.08	1.79	1.8	1.87
4	36.2	36.2	36.6	37.3		4	6.6	6.5	6.9	6.4		4	1.54	1.62	1.57	1.56
5	35.4	35.7	35.7	36.5		5	4.75	4.55	4.55	4.7		5	1.68	1.41	1.58	1.46
6	36.5	36.8	36.9	36.2		6	4.12	5.25	4.9	5.5		6	1.9	1.65	1.71	1.55
7	34.3	34.5	36.2	37		7	5.7	6.1	6.2	6.6		7	1.73	1.6	1.71	1.42
8	36	36.2	36.5	37.4		8	5	5.9	5.55	5.8		8	1.96	1.82	1.73	1.33
9	35.6	35.6	35.9	36.4		9	4.6	5.1	5.2	6.3		9	1.55	1.6	1.54	1.36
10	36.1	36.2	36.5	37.4		10	5.15	5.8	5.9	6.4		10	1.89	1.82	1.78	1.84
11	35.8	36	36.7	37		11	5.8	5.7	5.8	5.85		11	1.94	1.65	1.69	1.61
12	36	36.9	36.9	37.3		12	7.4	8.4	7.9	8.9		12	1.63	1.27	1.43	1.4
13	35.2	35.2	35.4	36		13	4.7	5.5	5.5	5		13	2	1.84	1.82	1.68
14	35	35.2	36.2	36.4		14	3.1	4.25	4.3	4.05		14	2.06	1.7	1.77	1.64
15	35.5	35.7	36.7	37		15	4.6	4.9	4.8	5.1		15	2.07	1.73	1.69	1.94
16	35.4	35.4	35.9	36.7		16	5.5	5.5	5	5.8		16	1.66	1.62	1.61	1.6
17	35.9	36	36	36.2		17	5.8	6.1	5.8	6.55		17	1.61	1.61	1.53	1.27
18	35	35.9	36	36.5		18	4.2	4.8	5.1	4.96		18	1.91	1.78	1.58	1.47
19	35	35.6	36.8	37		19	5.9	6.1	6.4	6.95		19	1.67	1.63	1.6	1.46
MOYENNE	35,4 ± 0,6	35,6 ± 0,7	36,2 ± 0,6	36,7 ± 0,5		Moyenne	4.97737	5.51842	5.47895	5.79		Moyenne	1.82737	1.66526	1.66263	1.54947
Sprint 20m ( s)	20m)						Illinois agility test with ball (sec)						Illinois Agility test with ball (sec)
Athletes	08:00h	11:00h	15:00h	18:00h		Athletes	08:00h	11:00h	15:00h	18:00h		Athletes	08:00h	11:00h	15:00h	18:00h
1	4.81	4.28	4.32	3.83		1	18.24	17.39	17.87	16.66		1	23.39	22.05	23.84	21.48
2	4.42	4.21	4.27	4.03		2	19.05	18.54	18.3	18.3		2	24.75	22.57	22.9	22.08
3	4.77	4.32	4.37	4.24		3	18.78	18.14	17.9	17.69		3	26.51	25.69	25.72	25.23
4	3.87	3.81	3.92	3.79		4	16.69	16.47	16.75	15.9		4	24.83	24.2	24.87	22.38
5	4.26	4.11	4.34	4.01		5	17.96	17.63	18.02	17.36		5	21.38	20.75	21.15	20.42
6	4.5	4.13	4.1	4.1		6	17.93	17.45	17.72	17.36		6	25.63	22.66	22.02	22.36
7	4.21	3.72	3.89	3.65		7	18.04	16.91	17.27	16.72		7	24.99	22.87	23.63	22.03
8	4.62	4.29	4.39	3.93		8	18.96	17.66	17.99	18.08		8	24.23	23.08	23.11	23.03
9	4.14	3.96	4.06	3.9		9	18.23	17.47	17.51	17.2		9	25.02	22.72	24.02	22.65
10	4.4	4.24	4.27	4.11		10	18.81	17.87	18.17	17.99		10	25.93	25.14	25.23	25.04
11	4.47	4.22	4.13	4.02		11	18.23	18.22	18.35	18.18		11	27.95	27.63	27.42	27.33
12	3.72	3.56	3.66	3.95		12	17.27	17.07	17.03	16.89		12	25.02	23.56	24.05	23.33
13	4.38	4.18	4.25	4.06		13	18.14	17.84	17.69	17.63		13	25.35	25.05	26.57	24.33
14	4.37	4.2	4.26	4.15		14	18.02	17.09	17.33	17.01		14	24.84	22.99	23.02	22.48
15	4.42	4.28	4.27	4.21		15	17.56	17.2	17.35	17.12		15	23.53	22.96	23.03	22.59
16	4.05	4.05	4.22	4.12		16	18.27	18.2	18.03	17.81		16	24.21	24.03	23.75	22.72
17	3.65	3.6	3.62	3.41		17	16.78	16.48	16.69	16.54		17	21.68	21.48	23.03	21.39
18	4.23	4.13	3.96	3.71		18	17.36	17.26	16.87	16.41		18	27.11	26.01	26.38	24.11
19	4.2	4.01	4.12	3.9		19	17.27	17.07	17.11	16.62		19	23.63	23.5	24.44	23.21
MOYENNE	4.28895	4.06842	4.12737	3.95368		Moyenne	17.9784	17.4716	17.5763	17.2353		Moyenne	24.7358	23.6284	24.1147	23.0626
